# Supplementary material
Source: MDPI journal article supplement (https://www.mdpi.com/2073-4344/7/10/295)
Supplement: s1 [file s1]

# Supplementary Materials: Promoting the synthesis of ethanol and butanol by salicylic acid

Jinxin Zou, Lei Wang and Peijun Ji \*

Department of Chemical Engineering, Beijing University of Chemical Technology, Beijing 100029, China; Jinxin\_zhou@outlook.com (J. Z.); wanglei410@outlook.com (L.W.)

\* Correspondence: jipj@mail.buct.edu.cn; Tel.: +86-010-6442-3254

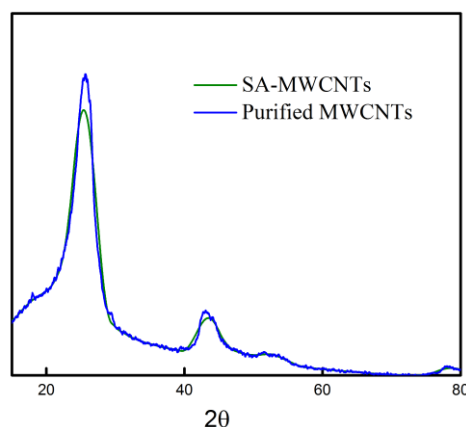

**Figure S1.** XRD pattern for purified MWCNTs and SA-MWCNTs.

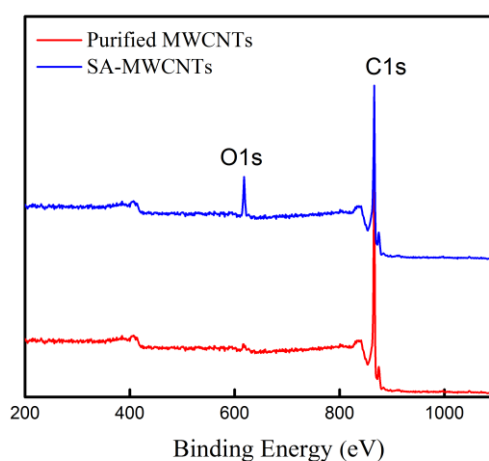

**Figure S2.** XPS spectra for purified MWCNTs and SA-MWCNTs.

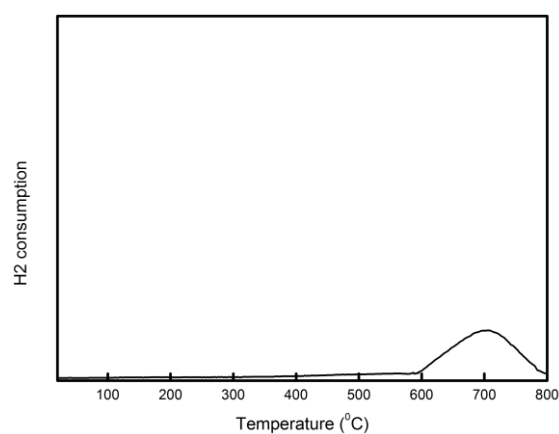

**Figure S3.** TRP profile for SA-MWCNTs.

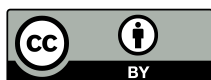

© 2017 by the authors. Licensee MDPI, Basel, Switzerland. This article is an open access article distributed under the terms and conditions of the Creative Commons Attribution (CC BY) license (<http://creativecommons.org/licenses/by/4.0/>).
